# Supplementary material for: Electrografting onto ITO substrates of poly(thiophene)-based micelles decorated by acrylate groups
Source: Royal Society of Chemistry journal article supplement (doi:10.1039/c3py00511a), 2013-01-01
Supplement: c3py00511a.pdf [file c3py00511a.pdf]

## Supporting Information

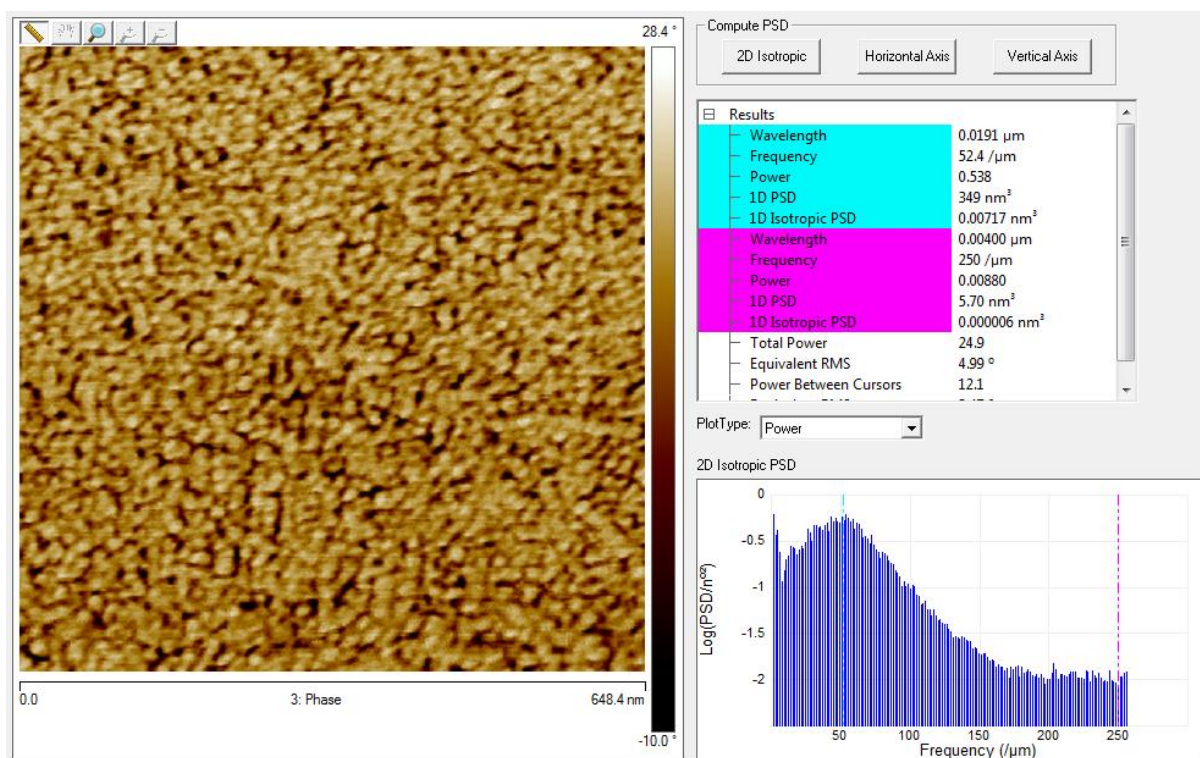

Figure S1 : Power Spectral Density analysis of the AFM phase image of a deposit of P3HT-*b*-P(AcET-*co*-PEGET) from a CHCl<sub>3</sub>/DMF (50/50) solution (Figure 2d of the main text). The peak in the frequency plot (cyan vertical line) corresponds to a length of 19 nm (see cyan-highlighted box), which is interpreted as the size of the objects in the image.

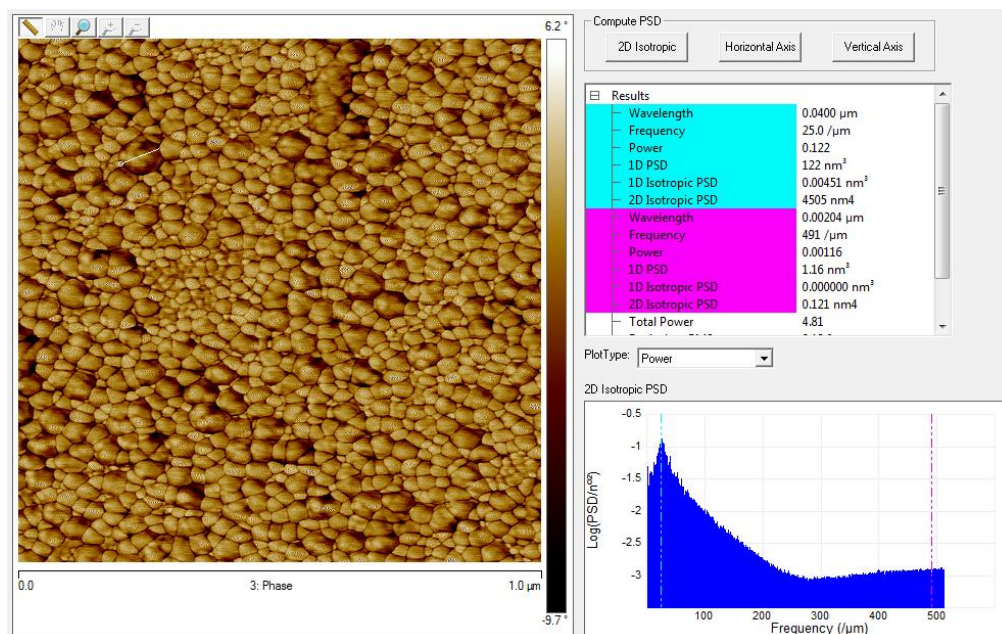

Figure S2: Power Spectral Density analysis of the AFM phase image of a deposit of P3HT-*b*-P(AcET-*co*-PEGET) from a CHCl<sub>3</sub>/DMF (50/50) solution (Figure 5c of the main text). The peak in the frequency plot (cyan vertical line) corresponds to a length of 40 nm (see cyan-highlighted box).
